# Supplementary material for: Processes to enable hysteresis-free operation of ultrathin ALD Te p-channel field-effect transistors
Source: Royal Society of Chemistry journal article supplement (doi:10.1039/d4nh00339j), 2024-01-01
Supplement: d4nh00339j5.pdf [file d4nh00339j5.pdf]

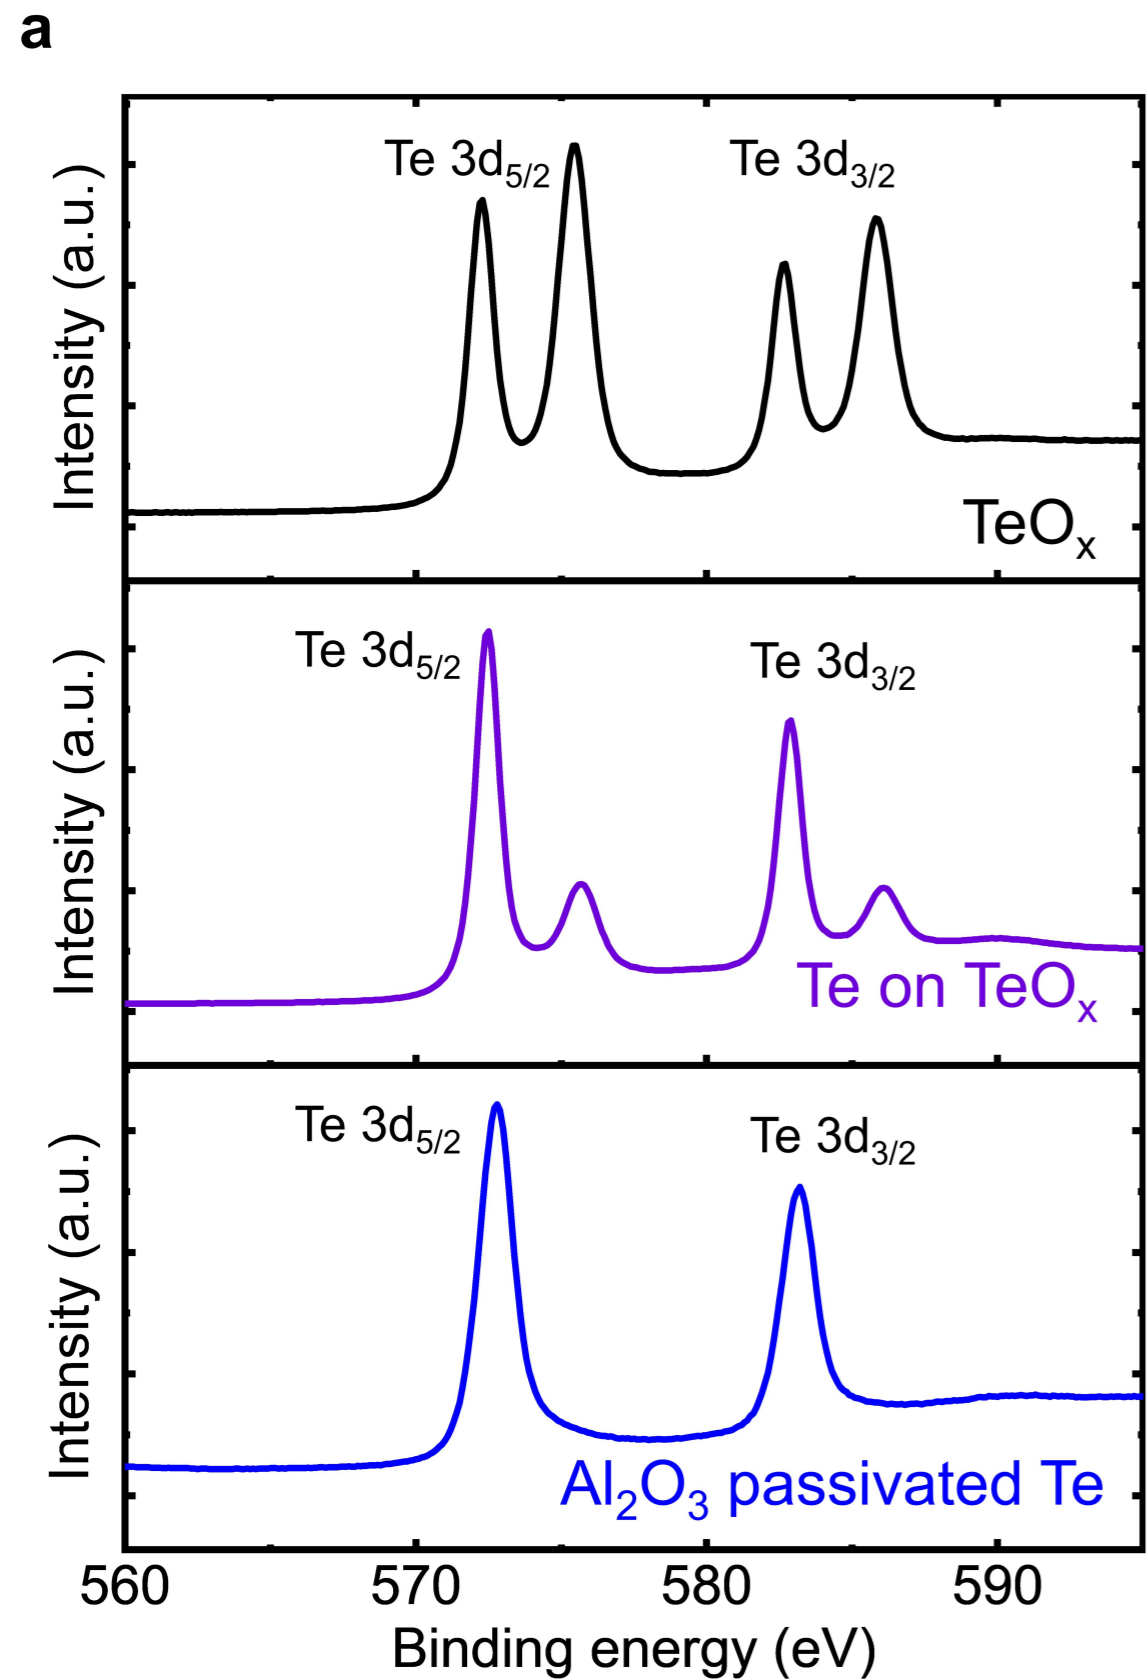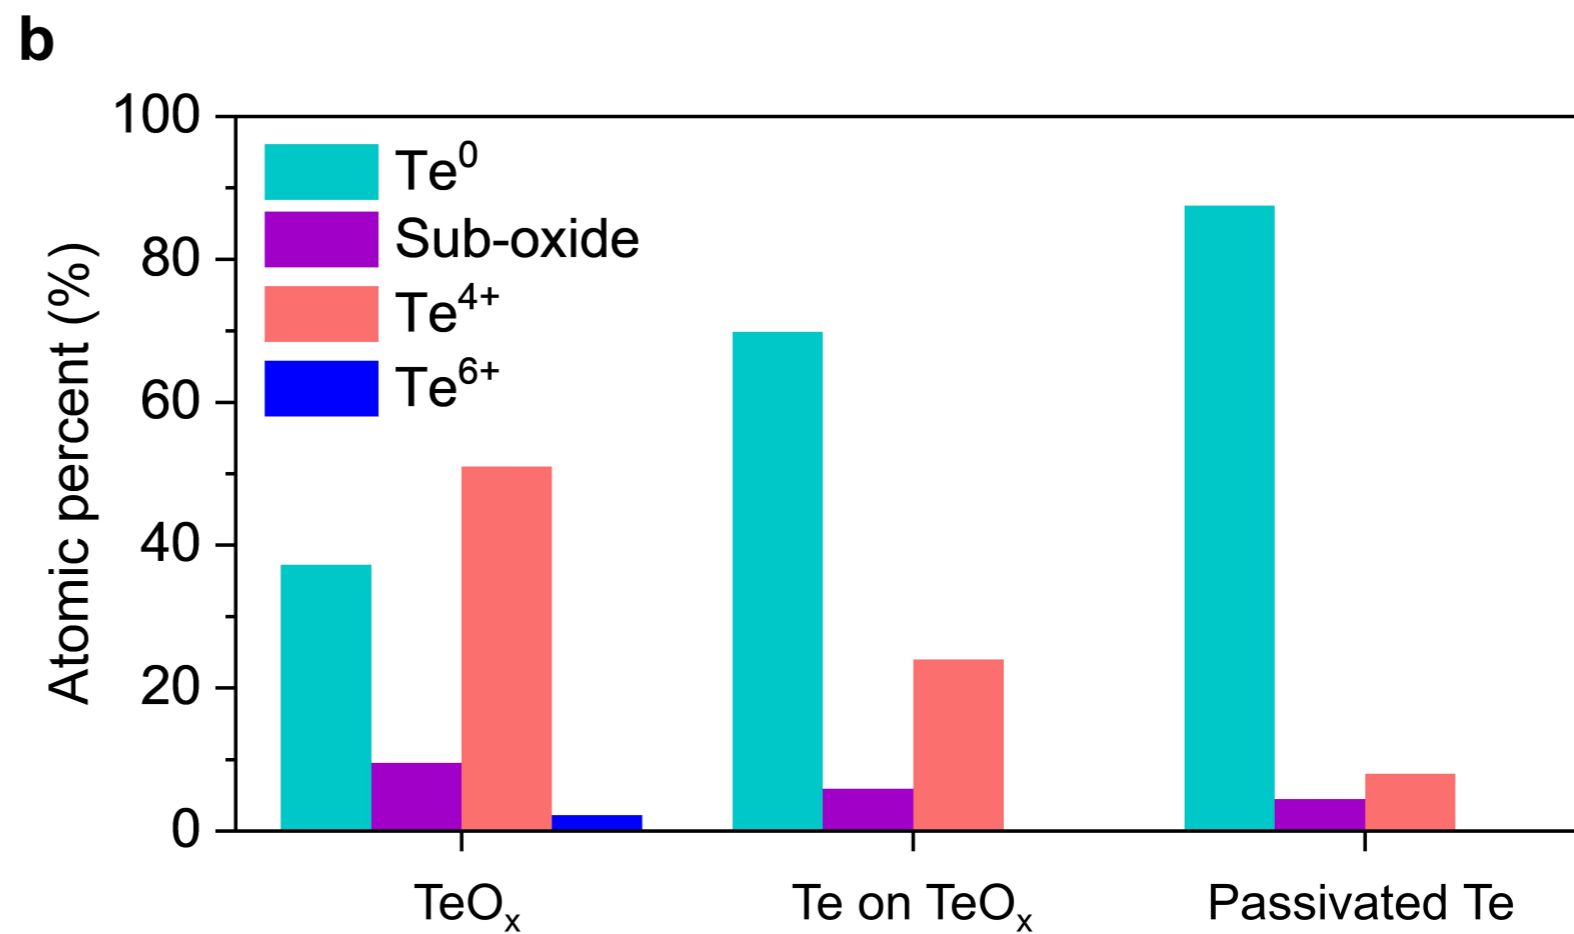

**c**

|                                    | TeO <sub>x</sub> | Te on TeO <sub>x</sub> | Al <sub>2</sub> O <sub>3</sub><br>passivated Te |
|------------------------------------|------------------|------------------------|-------------------------------------------------|
| Te <sup>0</sup>                    | 37.27            | 69.88                  | 87.55                                           |
| Sub-oxide                          | 9.51             | 5.93                   | 4.45                                            |
| Te <sup>4+</sup>                   | 50.99            | 24.02                  | 7.99                                            |
| Te <sup>6+</sup>                   | 2.23             | 0.17                   | 0.01                                            |
| Te <sup>0</sup> : Te <sup>4+</sup> | 1 : 1.37         | 1 : 0.34               | 1 : 0.09                                        |
