# Supplementary material for: Processes to enable hysteresis-free operation of ultrathin ALD Te p-channel field-effect transistors
Source: Royal Society of Chemistry journal article supplement (doi:10.1039/d4nh00339j), 2024-01-01
Supplement: d4nh00339j8.pdf [file d4nh00339j8.pdf]

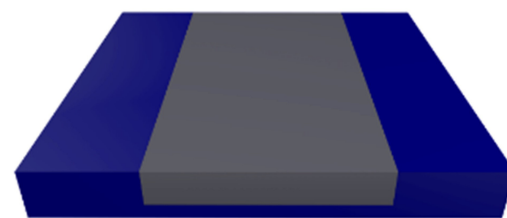

1. Buried gate formation

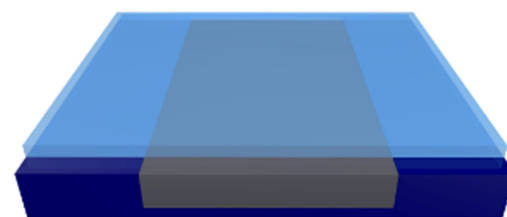

2. Dielectric deposition

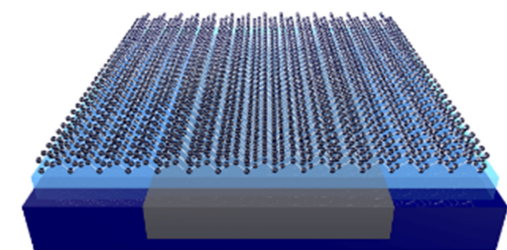

3. Channel deposition

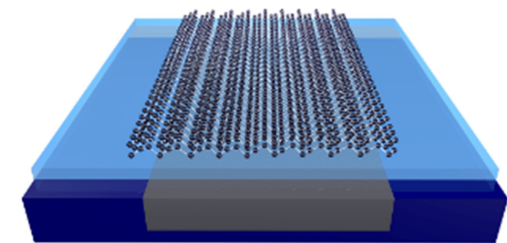

4. Channel patterning

- SiO<sub>2</sub> trench formation
- Aluminum deposition
- Lift-off

- Al<sub>2</sub>O<sub>3</sub> 12 nm deposition at 200 °C

- TeO<sub>x</sub> 3 nm deposition by sputtering
- Te deposition by ALD at 80 °C

- Dry etching

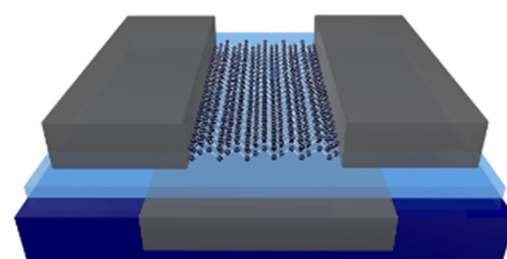

5. Source/Drain formation

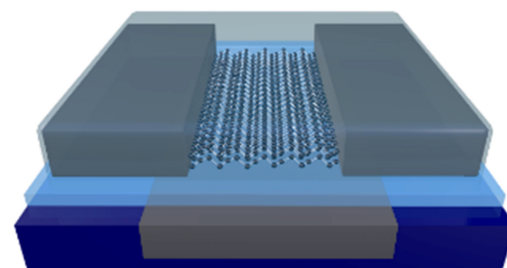

6. Passivation layer deposition

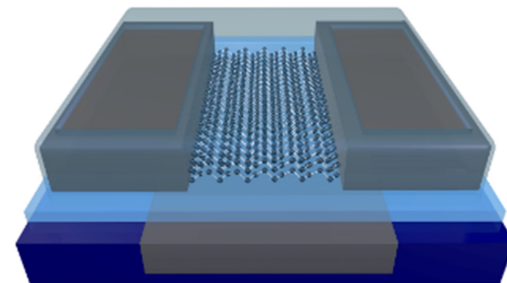

7. Contact pad open

- Source/Drain electrode patterning
- Nickel deposition
- Lift-off

- Al<sub>2</sub>O<sub>3</sub> 10 nm deposition

- Contact pad open patterning
- Wet etching
