# Supplementary figures and images for: Processes to enable hysteresis-free operation of ultrathin ALD Te p-channel field-effect transistors
Source: Royal Society of Chemistry journal article supplement (doi:10.1039/d4nh00339j), 2024-01-01

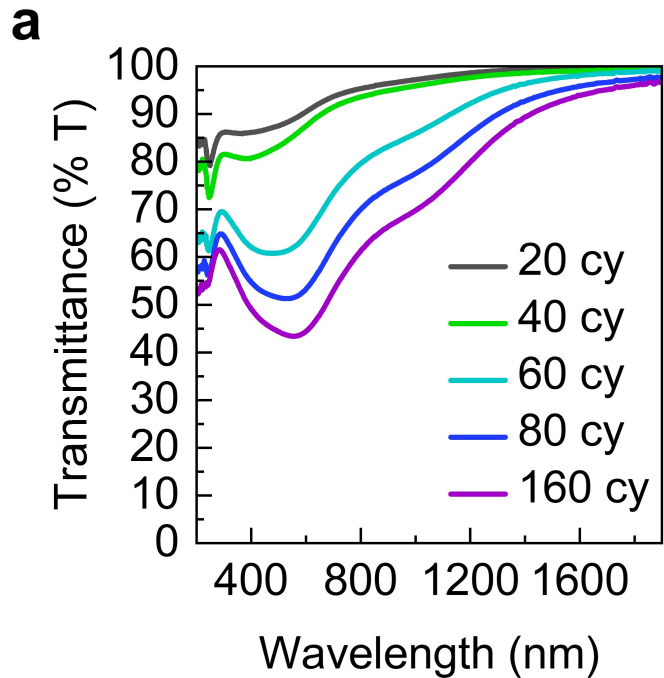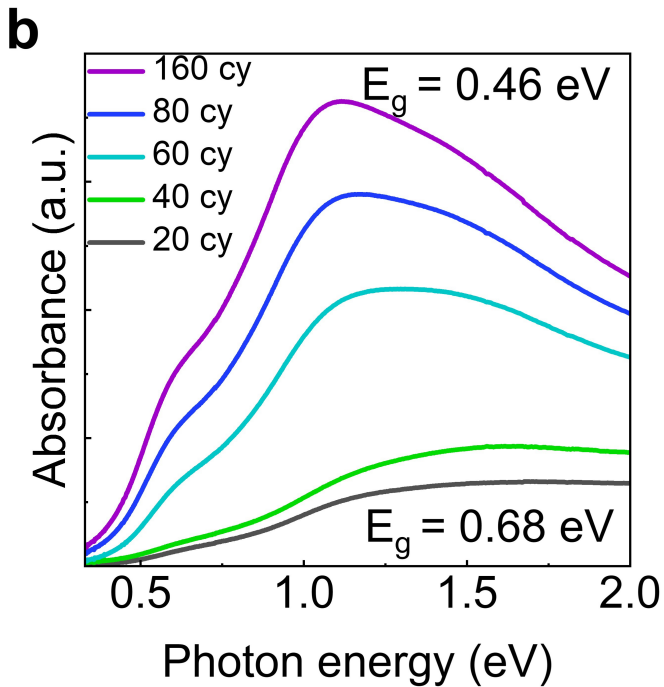

Supplement: d4nh00339j10.pdf [file d4nh00339j10.pdf]

**a**

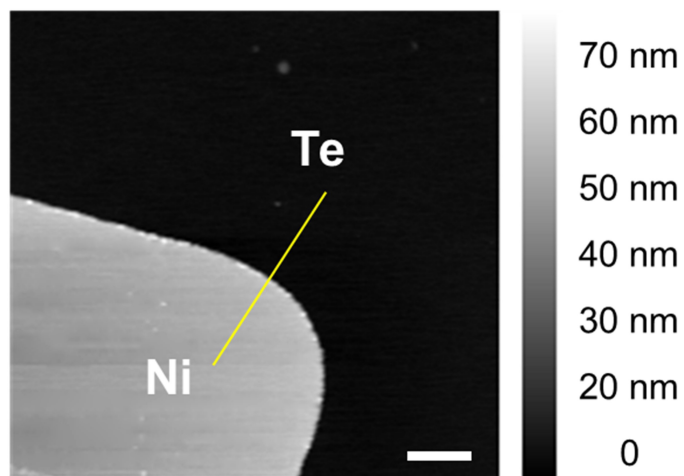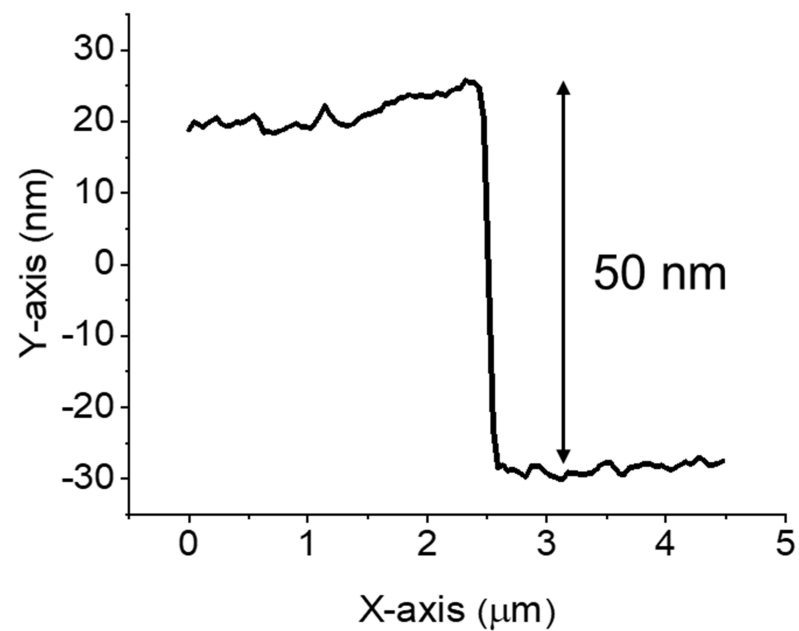

**b**

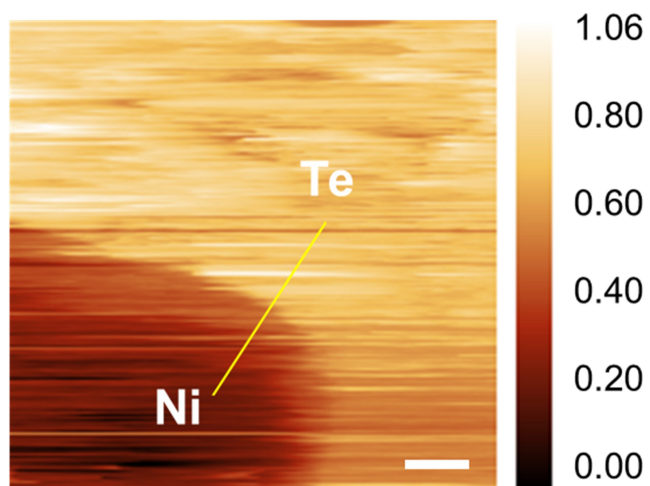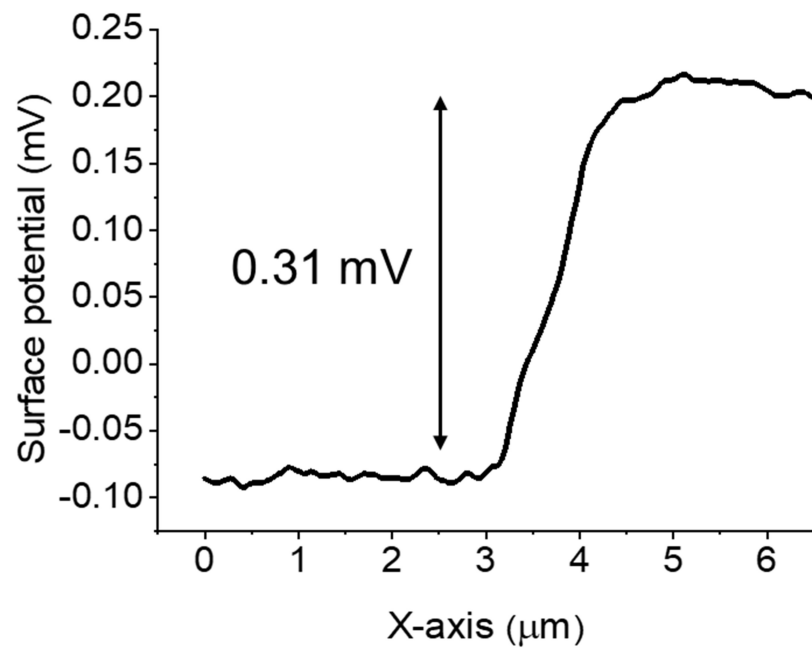

Supplement: d4nh00339j11.pdf [file d4nh00339j11.pdf]

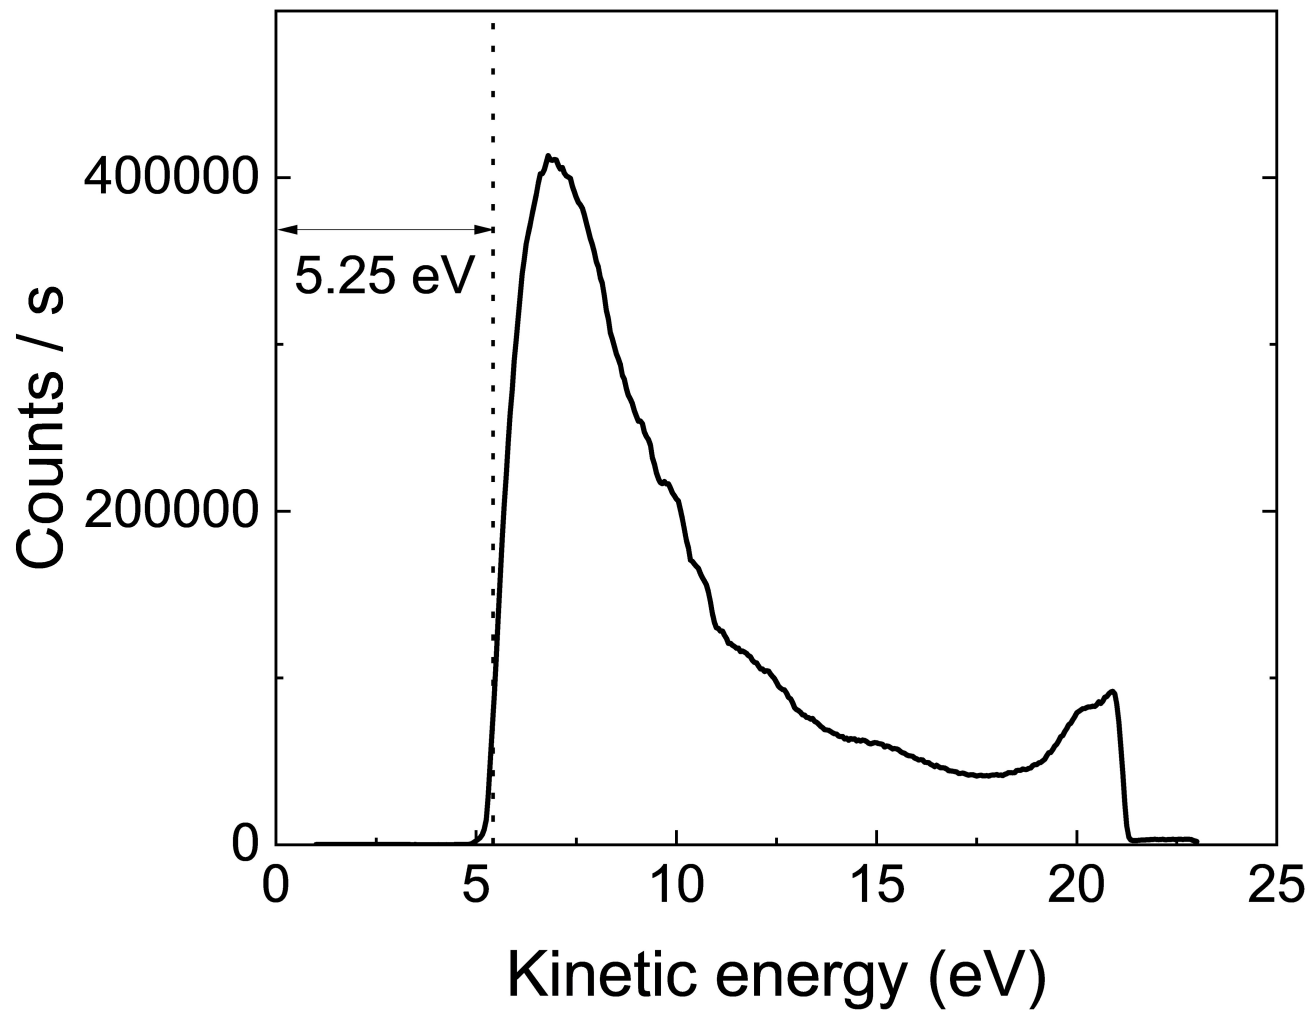

Supplement: d4nh00339j12.pdf [file d4nh00339j12.pdf]

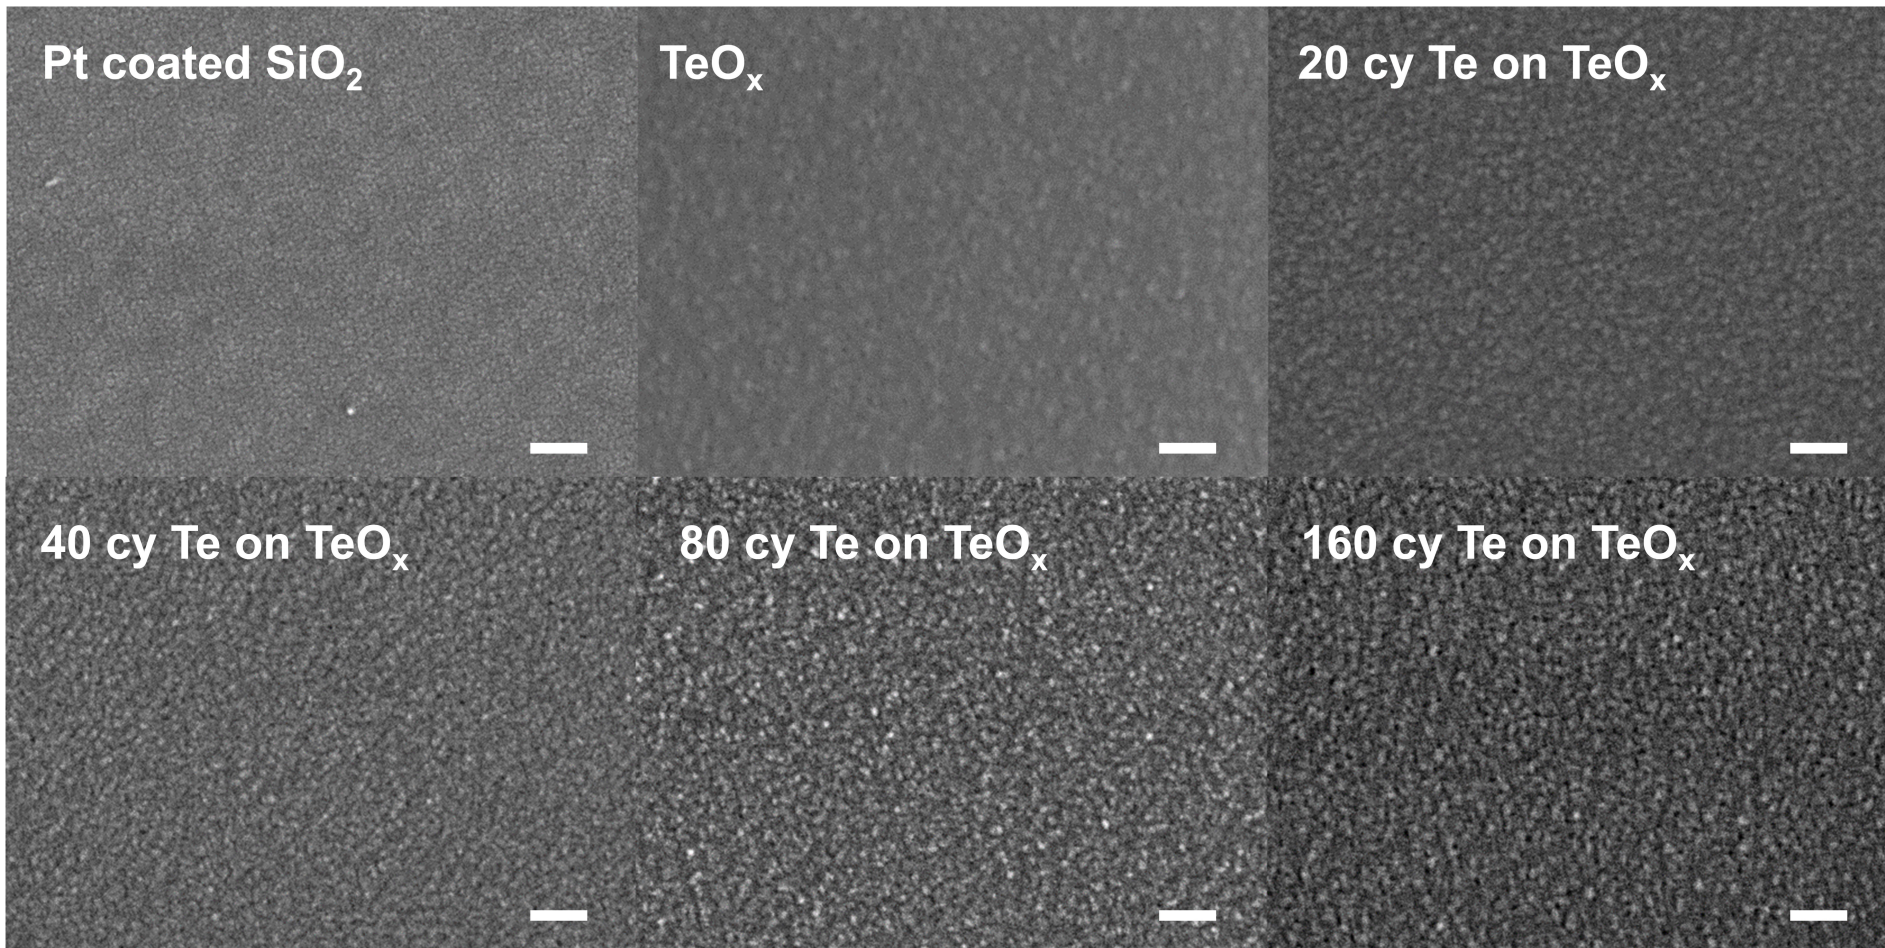

Supplement: d4nh00339j2.pdf [file d4nh00339j2.pdf]

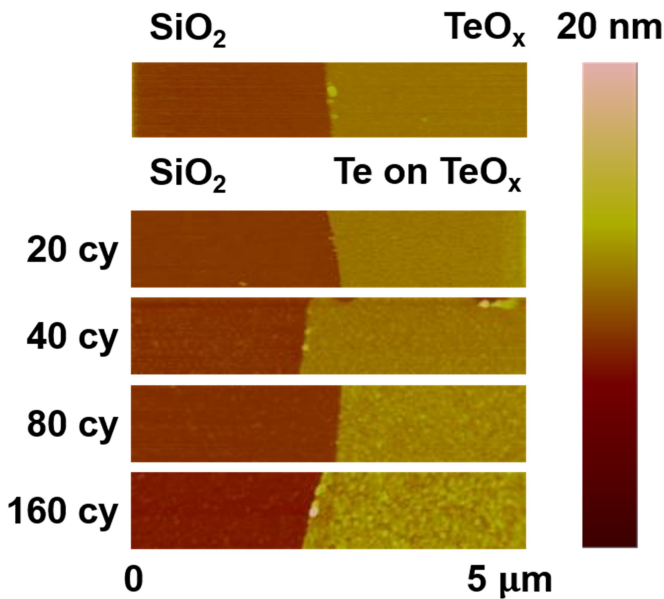

Supplement: d4nh00339j3.pdf [file d4nh00339j3.pdf]

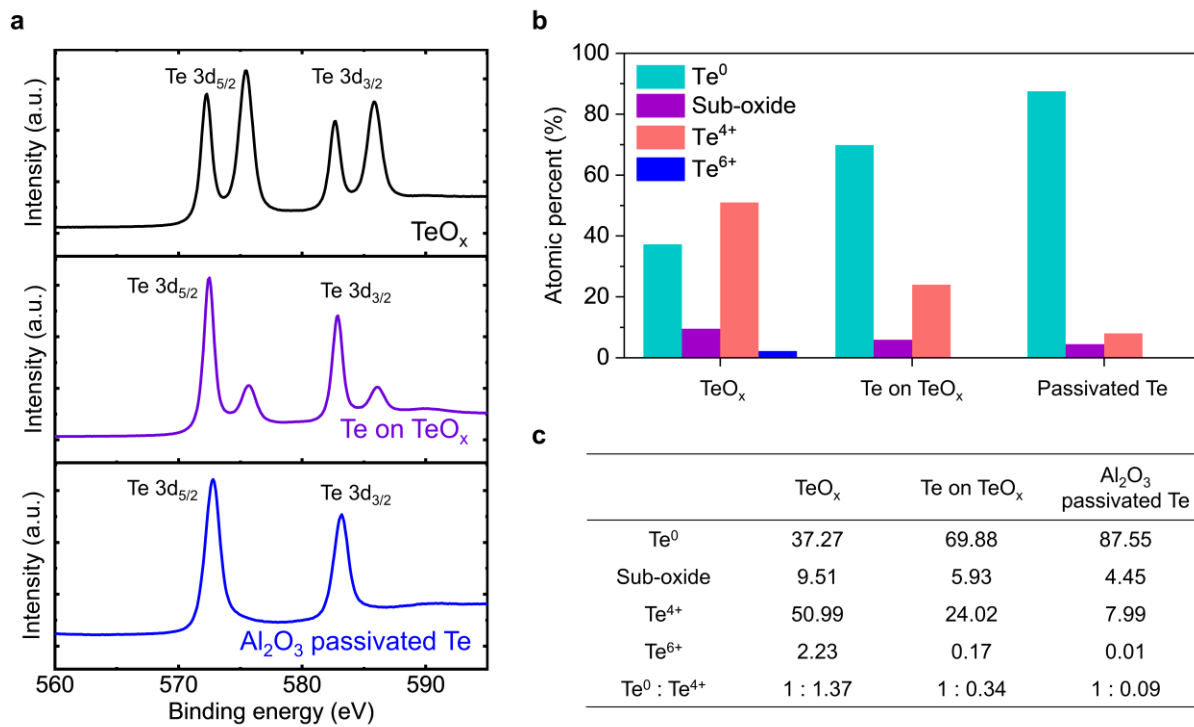

Figure S3

Supplement: d4nh00339j4.pdf [file d4nh00339j4.pdf]

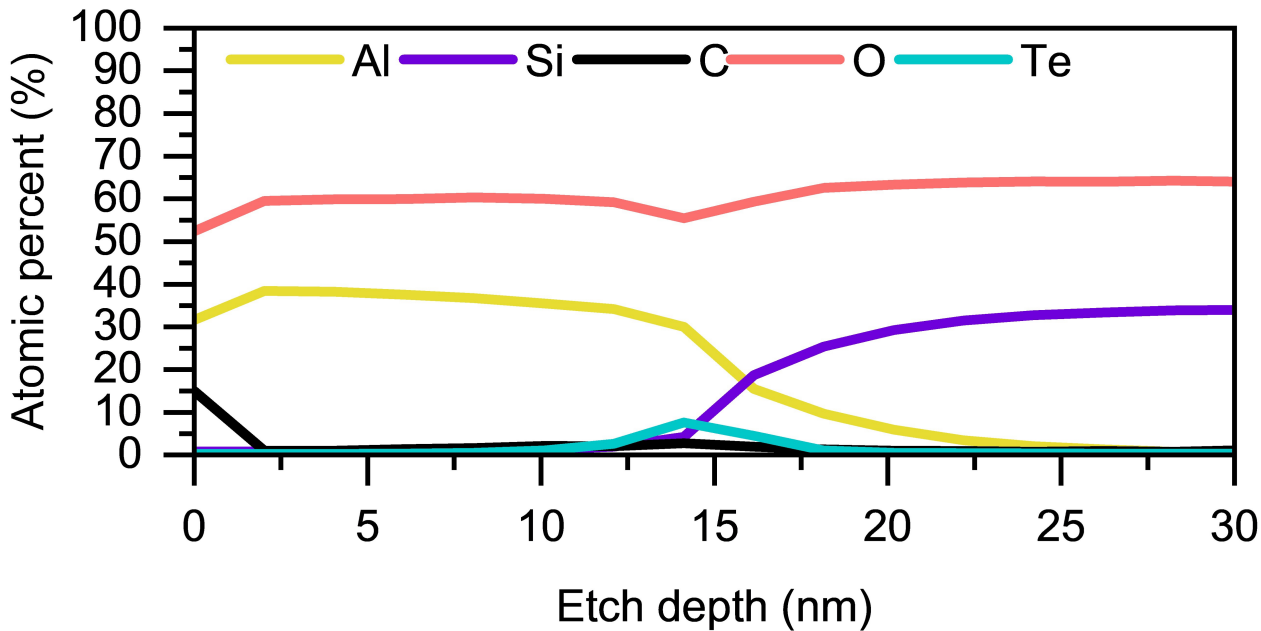

Supplement: d4nh00339j6.pdf [file d4nh00339j6.pdf]

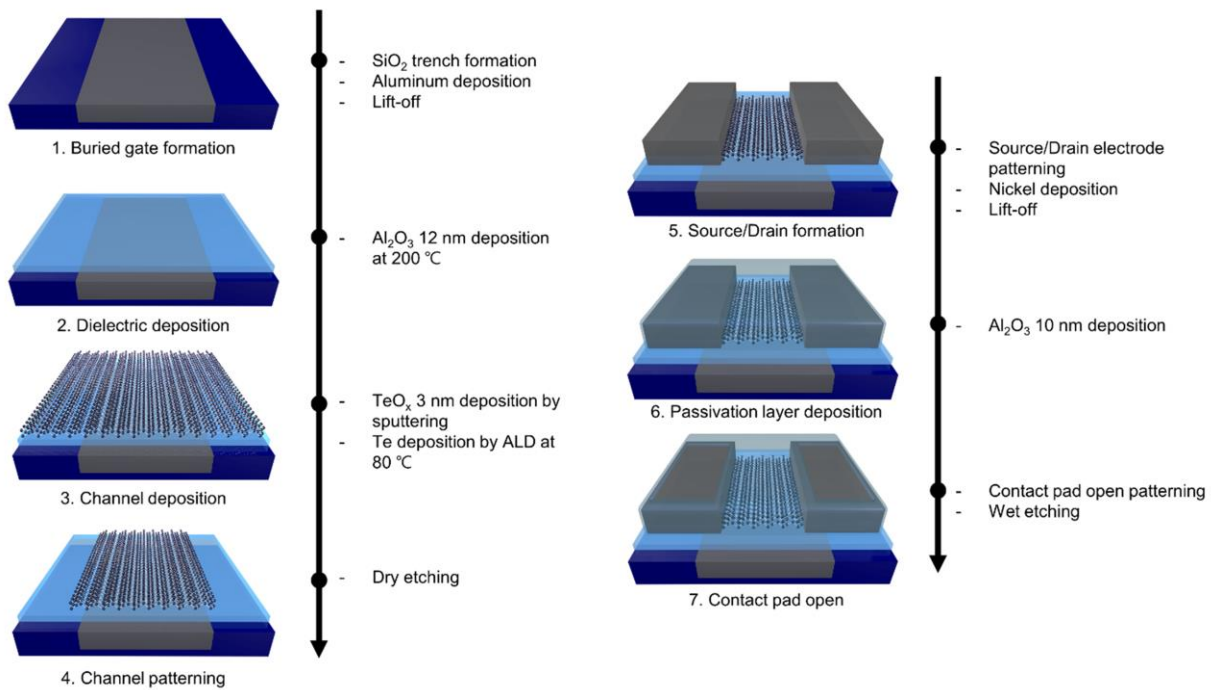

Figure S5

Supplement: d4nh00339j7.pdf [file d4nh00339j7.pdf]

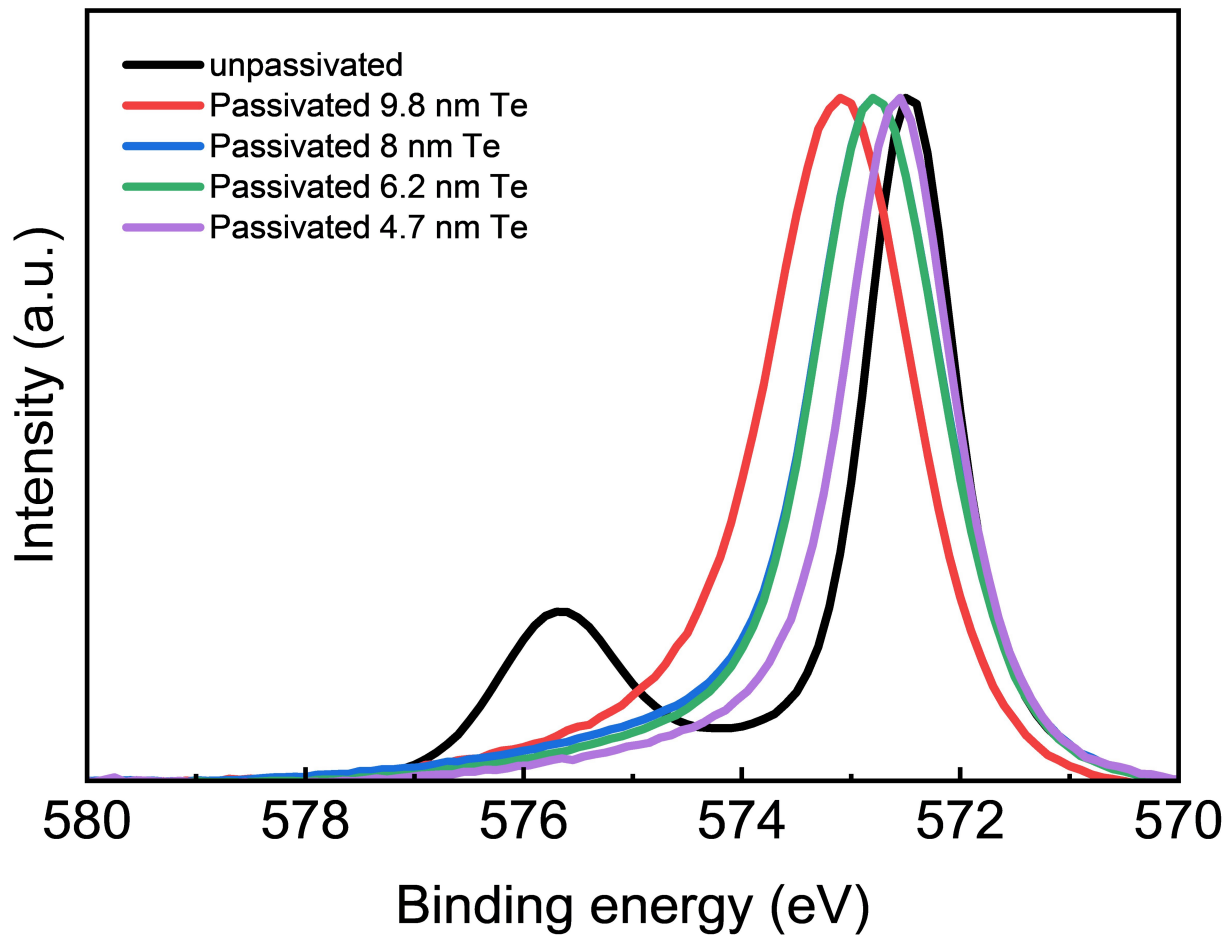

Supplement: d4nh00339j9.pdf [file d4nh00339j9.pdf]
